# Supplementary material
Source: PubMed Central journal article supplement (PMC7159298)
Supplement: mmc1.pdf [file mmc1.pdf]

# THE LANCET

## **Supplementary appendix**

This appendix formed part of the original submission and has been peer reviewed. We post it as supplied by the authors.

Supplement to: Guery B, Poissy J, el Mansouf L, et al, and the MERS-CoV study group et al. Clinical features and viral diagnosis of two cases of infection with Middle East Respiratory Syndrome coronavirus: a report of nosocomial transmission. *Lancet* 2013; published online May 29. [http://dx.doi.org/10.1016/S0140-6736\(13\)60982-4](http://dx.doi.org/10.1016/S0140-6736(13)60982-4).

# Figure 1S

## RdRp

|         |                   |                   |                   |                   |                   |                   |                   |                   |     |
|---------|-------------------|-------------------|-------------------|-------------------|-------------------|-------------------|-------------------|-------------------|-----|
|         |                   | 20                |                   | 40                |                   | 60                |                   | 80                |     |
| EMC     | <b>TCGCACTGTT</b> | <b>GCAGGCGTGT</b> | <b>CCATACTTAG</b> | <b>CACAATGACT</b> | <b>AATCGCCAGT</b> | <b>ACCATCAGAA</b> | <b>AATGCTTAAG</b> | <b>TCCATGGCTG</b> | 80  |
| JOR     | .....             | .....             | .....             | .....             | .....             | .....             | .....             | .....             | 80  |
| ENG1    | .....             | .....             | .....             | .....             | .....             | .....             | .....             | .....             | 80  |
| ENG/QA  | .....             | .....             | .....             | .....             | .....             | .....             | .....             | .....             | 80  |
| MUN/ABD | .....             | .....             | .....             | .....             | .....             | .....             | .....             | .....             | 80  |
| FR1/UAE | .....             | .....             | .....             | .....             | .....             | .....             | .....             | .....             | 80  |
| FR2     | .....             | .....             | .....             | .....             | .....             | .....             | .....             | .....             | 80  |
|         |                   | 100               |                   | 120               |                   | 140               |                   | 160               |     |
| EMC     | <b>CAACTCGTGG</b> | <b>AGCGACTTGC</b> | <b>GTCATTGGTA</b> | <b>CTACAAAGTT</b> | <b>CTACGGTGGC</b> | <b>TGGGATTTC</b>  | <b>TGCTTAAAC</b>  | <b>ATTGTACAAA</b> | 160 |
| JOR     | .....             | .....             | .....             | .....             | .....             | .....             | .....             | .....             | 160 |
| ENG1    | .....             | .....             | .....             | .....             | .....             | .....             | .....             | .....             | 160 |
| ENG/QA  | .....             | .....             | .....             | .....             | .....             | .....             | .....             | .....             | 160 |
| MUN/ABD | .....             | .....             | .....             | .....             | .....             | .....             | .....             | .....             | 160 |
| FR1/UAE | .....             | .....             | .....             | .....             | .....             | .....             | .....             | .....             | 160 |
| FR2     | .....             | .....             | .....             | .....             | .....             | .....             | .....             | .....             | 160 |
|         |                   | 180               |                   |                   |                   |                   |                   |                   |     |
| EMC     | <b>GATGTTGATA</b> | <b>ATCCGCATCT</b> | <b>TA</b>         | 182               |                   |                   |                   |                   |     |
| JOR     | .....             | .....             | .....             | 182               |                   |                   |                   |                   |     |
| ENG1    | .....             | .....             | .....             | 182               |                   |                   |                   |                   |     |
| ENG/QA  | .....             | .....             | .....             | 182               |                   |                   |                   |                   |     |
| MUN/ABD | .....             | .....             | .....             | 182               |                   |                   |                   |                   |     |
| FR1/UAE | .....             | .....             | .....             | 182               |                   |                   |                   |                   |     |
| FR2     | .....             | .....             | .....             | 182               |                   |                   |                   |                   |     |

## N

|         |                   |                   |                   |                   |                   |                    |                   |                   |     |
|---------|-------------------|-------------------|-------------------|-------------------|-------------------|--------------------|-------------------|-------------------|-----|
|         |                   | 20                |                   | 40                |                   | 60                 |                   | 80                |     |
| EMC     | <b>AATAAGTGGT</b> | <b>TGGAGCTTCT</b> | <b>TGAGCAAAAT</b> | <b>ATTGATGCCT</b> | <b>ACAAAACCTT</b> | <b>CCCTAAGAAG</b>  | <b>GAAAAGAAAC</b> | <b>AAAAGGCACC</b> | 80  |
| JOR     | .....             | .....             | .....             | .....             | .....             | .....              | .....             | .....             | 80  |
| ENG1    | .....             | .....             | .....             | .....             | .....             | .....              | .....             | .....             | 80  |
| ENG/QA  | .....             | .....             | .....             | .....             | .....             | .....              | .....             | .....             | 80  |
| MUN/ABD | .....             | .....             | .....             | .....             | .....             | .....              | .....             | .....             | 80  |
| FR1/UAE | .....             | .....             | .....             | .....             | .....             | .....              | .....             | .....             | 80  |
| FR2     | .....             | .....             | .....             | .....             | .....             | .....              | .....             | .....             | 56  |
|         |                   | 100               |                   | 120               |                   | 140                |                   | 160               |     |
| EMC     | <b>AAAAGAAGAA</b> | <b>TCAACAGACC</b> | <b>AAATGTCTGA</b> | <b>ACCTCCAAG</b>  | <b>GAGCAGCGTG</b> | <b>TGCAAGGTAG</b>  | <b>CATCACTCAG</b> | <b>CGCACTCGCA</b> | 160 |
| JOR     | .....             | .....             | .....             | .....             | .....             | .....              | .....             | .....             | 160 |
| ENG1    | .....             | .....             | .....             | .....             | .....             | .....              | .....             | .....             | 160 |
| ENG/QA  | .....             | .....             | .....             | .....             | .....             | .....              | .....             | .....             | 154 |
| MUN/ABD | .....             | .....             | .....             | .....             | .....             | .....              | .....             | .....             | 160 |
| FR1/UAE | .....             | .....             | .....             | .....             | .....             | .....              | .....             | .....             | 160 |
| FR2     | .....             | .....             | .....             | .....             | .....             | .....              | .....             | .....             | 136 |
|         |                   | 180               |                   | 200               |                   | 220                |                   | 240               |     |
| EMC     | <b>CCCGTCCAAG</b> | <b>TGTTCAGCCT</b> | <b>GGTCCAATGA</b> | <b>TTGATGTTAA</b> | <b>CACTGATTAG</b> | <b>TGTCACCTCAA</b> | <b>AGTAACAAGA</b> | <b>TCGCGGCAAT</b> | 240 |
| JOR     | .....             | .....             | .....             | .....             | .....             | .....              | .....             | .....             | 240 |
| ENG1    | .....             | .....             | .....             | .....             | .....             | .....              | .....             | .....             | 240 |
| ENG/QA  | .....             | .....             | .....             | .....             | .....             | .....              | .....             | .....             | 234 |
| MUN/ABD | .....             | .....             | .....             | .....             | .....             | .....              | .....             | .....             | 240 |
| FR1/UAE | .....             | .....             | .....             | .....             | .....             | .....              | .....             | .....             | 240 |
| FR2     | .....             | .....             | .....             | .....             | .....             | .....              | .....             | .....             | 216 |
| EMC     | <b>C</b>          | 241               |                   |                   |                   |                    |                   |                   |     |
| JOR     | .....             | 241               |                   |                   |                   |                    |                   |                   |     |
| ENG1    | .....             | 241               |                   |                   |                   |                    |                   |                   |     |
| ENG/QA  | .....             | 235               |                   |                   |                   |                    |                   |                   |     |
| MUN/ABD | .....             | 241               |                   |                   |                   |                    |                   |                   |     |
| FR1/UAE | .....             | 241               |                   |                   |                   |                    |                   |                   |     |
| FR2     | .....             | 217               |                   |                   |                   |                    |                   |                   |     |

**Figure 1S:** Alignments of the RdRp and N gene sequences the MERS-CoV of patients 1 and 2 with other available MERS-CoV sequences.

Sequences of patient 1 (FR1/UAE: Hu/France-UAE/1612/2013) and patient 2 (FR2: Hu/France/1631/2013) of the RdRp (nt 15073-15254) and N (nt 29598 or 29622-29838,) gene segments were aligned with available MERS-CoV sequences EMC: EMC/2012 (GenBank accession n°. JX869059), JOR: Jordan-N3/2012 (GenBank accession n°. KC776174), ENG1: England-1/2012 (GenBank accession n°. KC164505), ENG/QA: England/Qatar/2013 (GenBank accession n°. KC667074), and MUN/ABD: Munich/Abu\_Dhabi/2013 (website Universitätsklinikum Bonn Institut für Virologie, <http://www.virology-bonn.de/index.php?id=46>; accessed on May 20, 2013). Dots represent identical nucleotides, hyphens represent sequence gaps.
